# Supplementary material for: Evidence for a delay in diagnosis of Wilms’ tumour in the UK compared with Germany: implications for primary care for children
Source: HighWire-hosted journal article supplement (doi:10.1136/archdischild-2015-309212), 2016-03-06

Supplementary Figure 2:

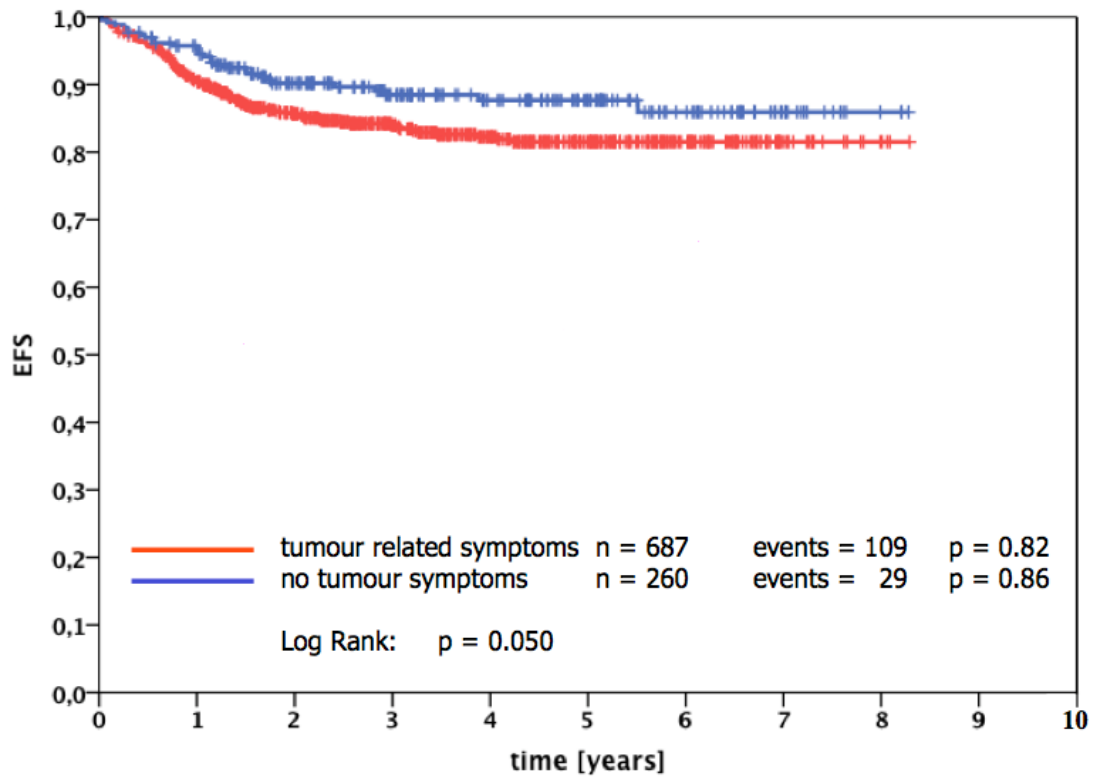

Supplement: archdischild-2015-309212supp_figure2.pdf [file archdischild-2015-309212supp_figure2.pdf]
